# Supplementary material for: Metabolically (un)healthy obesity and risk of obesity-related cancers: a pooled study
Source: Oxford University Press journal article supplement (doi:10.1093/jnci/djad008), 2023-01-17
Supplement: djad008_supplementary_data.pdf [file djad008_supplementary_data.pdf]

Supplementary table 1. Baseline characteristics of individuals with vs. without glucose measurement within the NCS and the 40-y cohorts

| Characteristics                            | NCS                 |                 | 40-y                |                 |
|--------------------------------------------|---------------------|-----------------|---------------------|-----------------|
|                                            | Glucose non-missing | Glucose missing | Glucose non-missing | Glucose missing |
| Total, n (%)                               | 60,695 (100)        | 29,295 (100)    | 131,551 (100)       | 261,010 (100)   |
| Sex, n (%)                                 |                     |                 |                     |                 |
| Male                                       | 31,120 (51.3)       | 14,926 (51.0)   | 69,382 (52.7)       | 127,152 (48.7)  |
| Female                                     | 29,575 (48.7)       | 14,369 (49.0)   | 62,169 (47.3)       | 133,858 (51.3)  |
| Age, years                                 |                     |                 |                     |                 |
| Mean (SD)                                  | 40.0 (6.9)          | 39.6 (7.8)      | 41.3 (1.3)          | 42.6 (5.7)      |
| Category, n (%)                            |                     |                 |                     |                 |
| <30                                        | 6,418 (10.6)        | 4,173 (14.2)    | 43 (0.0)            | 752 (0.3)       |
| 30-44                                      | 37,214 (61.3)       | 21,284 (72.7)   | 131,267 (99.8)      | 246,105 (94.3)  |
| 45-59                                      | 17,063 (28.1)       | 3,709 (12.7)    | 175 (0.1)           | 974 (0.4)       |
| ≥60                                        | 0 (0)               | 129 (0.4)       | 66 (0.1)            | 13,179 (5.0)    |
| Baseline year, n (%)                       |                     |                 |                     |                 |
| 1974-1979                                  | 60,308 (99.4)       | 35 (0.1)        | 0 (0)               | 0 (0)           |
| 1980-1984                                  | 387 (0.6)           | 6,221 (21.2)    | 0 (0)               | 0 (0)           |
| 1985-1989                                  | 0 (0)               | 23,039 (78.7)   | 0 (0)               | 86,835 (33.3)   |
| 1990-1994                                  | 0 (0)               | 0 (0)           | 6,501 (4.9)         | 174,124 (66.7)  |
| 1995-1999                                  | 0 (0)               | 0 (0)           | 125,050 (95.1)      | 51 (0)          |
| Follow-up time, years                      |                     |                 |                     |                 |
| Mean (SD)                                  | 31.7 (8.4)          | 25.2 (5.6)      | 15.3 (2.4)          | 20.7 (4.5)      |
| Category, n (%)                            |                     |                 |                     |                 |
| <10                                        | 2,260 (3.7)         | 1,118 (3.8)     | 4,023 (3.1)         | 10,916 (4.2)    |
| 10-19                                      | 4,759 (7.8)         | 2,248 (7.7)     | 127,528 (96.9)      | 76,884 (29.4)   |
| 20-29                                      | 8,954 (14.8)        | 21,362 (72.9)   | 0 (0)               | 173,210 (66.4)  |
| ≥30                                        | 44,722 (73.7)       | 4,567 (15.6)    | 0 (0)               | 0 (0)           |
| Smoking status, n (%)                      |                     |                 |                     |                 |
| Never smoker                               | 21,339 (35.2)       | 10,627 (36.3)   | 25,134 (19.1)       | 93,423 (35.8)   |
| Ex-smoker                                  | 10,888 (17.9)       | 6,077 (20.7)    | 80,438 (61.1)       | 61,170 (23.4)   |
| Current smoker                             | 28,379 (46.8)       | 12,586 (43.0)   | 24,743 (18.9)       | 106,365 (40.8)  |
| Smoking intensity, pack years, n (%)       |                     |                 |                     |                 |
| <20                                        | 23,679 (83.4)       | 9,965 (79.2)    | 19,750 (79.8)       | 79,286 (74.5)   |
| ≥20                                        | 3,764 (13.3)        | 2,482 (19.7)    | 4,694 (19.0)        | 25,666 (24.1)   |
| Pack years missing                         | 936 (3.3)           | 139 (1.1)       | 299 (1.2)           | 1,413 (1.4)     |
| Smoking status missing                     | 89 (0.1)            | 5 (0.0)         | 1,236 (0.9)         | 52 (0.0)        |
| Body mass index, kg/m <sup>2</sup> ; n (%) |                     |                 |                     |                 |
| Mean (SD)                                  | 24.7 (3.5)          | 24.6 (3.6)      | 25.6 (3.8)          | 24.9 (3.6)      |
| Category, n (%)                            |                     |                 |                     |                 |
| 18.5-24.9                                  | 36,326 (59.9)       | 17,608 (60.1)   | 65,271 (49.6)       | 149,010 (57.1)  |
| 25-29.9                                    | 19,855 (32.7)       | 9,432 (32.2)    | 51,406 (39.1)       | 90,484 (34.7)   |
| ≥30                                        | 4,514 (7.4)         | 2,255 (7.7)     | 14,874 (11.3)       | 21,516 (8.2)    |
| Systolic BP, mmHg; mean (SD)               | 132.9 (16.7)        | 130.2 (15.7)    | 127.4 (12.5)        | 131.2 (15.7)    |

|                                  |               |               |                |                |
|----------------------------------|---------------|---------------|----------------|----------------|
| Diastolic BP, mmHg; mean (SD)    | 82.2 (11.1)   | 79.2 (10.8)   | 75.4 (10.2)    | 79.5 (10.3)    |
| Mid-BP, mmHg; mean (SD)          | 107.6 (12.6)  | 104.7 (12.3)  | 101.4 (11.6)   | 105.4 (12.2)   |
| Triglycerides, mmol/L; mean (SD) | 1.67 (1.09)   | 1.71 (1.17)   | 1.74 (1.2)     | 1.74 (1.2)     |
| Fasting status, hours; n (%)     |               |               |                |                |
| <4                               | 51,147 (84.3) | 24,427 (83.4) | 104,322 (79.3) | 210,795 (80.8) |
| 4-<8                             | 8,534 (14.1)  | 4,287 (14.6)  | 21,971 (16.7)  | 44,402 (17.0)  |
| ≥8                               | 1,014 (1.6)   | 581 (2.0)     | 5,258 (4.0)    | 5,813 (2.2)    |
| Diabetes, n (%)                  |               |               |                |                |
| No                               | 60,308 (99.4) | 29,078 (99.3) | 129,961 (98.8) | 258,524 (99.0) |
| Yes                              | 337 (0.5)     | 205 (0.7)     | 1167 (0.9)     | 2350 (0.9)     |
| Unknown                          | 50 (0.1)      | 12 (0.0)      | 423 (0.3)      | 136 (0.1)      |

---

Abbreviations: NCS, Norwegian Counties Study; 40-y, Age 40-programme; SD, standard deviation; BP, blood pressure.

Supplementary table 2. Results from multiplicative and additive interaction tests of metabolic health status and body mass index on obesity-related cancer risk, using three different categorisations of body mass index level

| Cancer type                 | Normal weight vs. overweight or obese |            |                    | Normal weight vs. obese |            |                    | Normal weight vs. overweight vs. obese <sup>1</sup> |
|-----------------------------|---------------------------------------|------------|--------------------|-------------------------|------------|--------------------|-----------------------------------------------------|
|                             | P multiplicative                      | P additive | RERI               | P multiplicative        | P additive | RERI               | P multiplicative                                    |
| All obesity-related cancers |                                       |            |                    |                         |            |                    |                                                     |
| All                         | 0.54                                  | 0.23       | 0.04 (-0.03,0.11)  | 0.66                    | 0.31       | 0.07 (-0.06,0.20)  | 0.48                                                |
| Women                       | 0.55                                  | 0.77       | -0.01 (-0.09,0.08) | 0.76                    | 0.99       | 0.00 (-0.15,0.15)  | 0.18                                                |
| Men                         | 0.21                                  | 0.04       | 0.13 (0.01,0.25)   | 0.11                    | 0.02       | 0.34 (0.07,0.61)   | 0.25                                                |
| Colon                       |                                       |            |                    |                         |            |                    |                                                     |
| All                         | 0.17                                  | 0.09       | 0.11 (-0.02,0.24)  | 0.53                    | 0.42       | 0.11 (-0.16,0.38)  | 0.65                                                |
| Women                       | 0.44                                  | 0.40       | 0.08 (-0.10,0.26)  | 0.85                    | 0.87       | 0.03 (-0.31,0.37)  | 0.75                                                |
| Men                         | 0.34                                  | 0.17       | 0.13 (-0.06,0.31)  | 0.36                    | 0.18       | 0.30 (-0.14,0.73)  | 0.64                                                |
| Rectal                      |                                       |            |                    |                         |            |                    |                                                     |
| All                         | 0.2                                   | 0.17       | 0.11 (-0.04,0.25)  | 0.52                    | 0.48       | 0.10 (-0.18,0.39)  | 0.56                                                |
| Women                       | 0.71                                  | 0.73       | -0.04 (-0.30,0.21) | 0.26                    | 0.30       | 0.24 (-0.69,0.21)  | 0.52                                                |
| Men                         | 0.05                                  | 0.03       | 0.21 (0.02,0.40)   | 0.06                    | 0.04       | 0.39 (0.02,0.76)   | 0.10                                                |
| Pancreatic                  |                                       |            |                    |                         |            |                    |                                                     |
| All                         | 0.55                                  | 0.65       | -0.05 (-0.29,0.18) | 0.58                    | 0.74       | -0.08 (-0.53,0.38) | 0.71                                                |
| Women                       | 0.42                                  | 0.53       | -0.13 (-0.52,0.26) | 0.50                    | 0.63       | -0.17 (-0.88,0.54) | 0.66                                                |
| Men                         | 0.72                                  | 0.69       | 0.06 (-0.24,0.35)  | 0.97                    | 0.94       | 0.02 (-0.58,0.63)  | 0.97                                                |
| Postmenopausal breast       |                                       |            |                    |                         |            |                    |                                                     |
| Women                       | 0.22                                  | 0.23       | -0.07 (-0.18,0.04) | 0.41                    | 0.43       | -0.08 (-0.29,0.12) | 0.42                                                |
| Endometrial                 |                                       |            |                    |                         |            |                    |                                                     |
| Women                       | 0.07                                  | 0.01       | 0.38 (0.12,0.65)   | 0.32                    | 0.07       | 0.53 (-0.04,1.10)  | 0.50                                                |
| Ovarian                     |                                       |            |                    |                         |            |                    |                                                     |
| Women                       | 0.48                                  | 0.48       | -0.09 (-0.34,0.16) | 0.63                    | 0.63       | 0.10 (-0.29,0.49)  | 0.28                                                |
| Renal cell                  |                                       |            |                    |                         |            |                    |                                                     |
| All                         | 0.87                                  | 0.44       | 0.10 (-0.16,0.37)  | 0.78                    | 0.15       | 0.40 (-0.14,0.95)  | 0.38                                                |

|                                |      |      |                    |      |      |                    |      |
|--------------------------------|------|------|--------------------|------|------|--------------------|------|
| Women                          | 0.44 | 0.78 | -0.06 (-0.51,0.38) | 0.96 | 0.50 | 0.30 (-0.56,1.15)  | 0.21 |
| Men                            | 0.85 | 0.36 | 0.16 (-0.18,0.49)  | 0.73 | 0.19 | 0.47 (-0.24,1.18)  | 0.77 |
| Multiple myeloma               |      |      |                    |      |      |                    |      |
| All                            | 0.30 | 0.30 | -0.17 (-0.50,0.15) | 0.69 | 0.69 | -0.10 (-0.62,0.41) | 0.76 |
| Women                          | 0.22 | 0.26 | -0.25 (-0.68,0.18) | 0.17 | 0.22 | -0.47 (-1.22,0.28) | 0.36 |
| Men                            | 0.98 | 0.96 | -0.01 (-0.45,0.43) | 0.40 | 0.38 | 0.30 (-0.37,0.98)  | 0.69 |
| Liver, intrahepatic bile ducts |      |      |                    |      |      |                    |      |
| All                            | 0.31 | 0.09 | 0.38 (-0.05,0.82)  | 0.75 | 0.28 | 0.54 (-0.44,1.53)  | 0.89 |
| Gallbladder                    |      |      |                    |      |      |                    |      |
| All                            | 0.15 | 0.21 | -0.34 (-0.85,0.19) | 0.25 | 0.37 | -0.46 (-1.46,0.54) | 0.26 |
| Other obesity-related          |      |      |                    |      |      |                    |      |
| All                            | 0.46 | 0.25 | 0.24 (-0.17,0.66)  | 0.29 | 0.10 | 0.81 (-0.17,1.78)  | 0.48 |

Abbreviations: RERI, relative excess risk for interaction

1. Only multiplicative interaction was tested. This 2 x 3 multiplicative interaction test corresponded to the BMI-health status categories analysed by Cox regression. Multiplicative interactions of metabolic health status and body mass index were tested by the Wald test of the respective product term in the Cox model using age as time scale, adjusted for sex, baseline age, and smoking status and pack-years, and stratified cohort and date of birth. Additive interactions of metabolic health status and body mass index were investigated by calculating the Relative Excess Risk for interaction as  $RR_{11}-RR_{10}-RR_{01}+1$ , for which the delta method was used to obtain confidence interval. RERI, Relative Excess Risk for interaction; CI, confidence interval; Metabolically healthy: middle and lowest tertile of metabolic score; Metabolically unhealthy: top tertile of metabolic score. Metabolic score composes equal weight from mid-blood pressure, glucose, and triglycerides; Normal weight:  $18.5 \leq BMI < 25 \text{ kg/m}^2$ ; Overweight:  $25 \leq BMI < 30 \text{ kg/m}^2$ ; Obese:  $BMI \geq 30 \text{ kg/m}^2$

Supplementary table 3. Hazard ratios and absolute risks (95% confidence interval) of all obesity-related cancer for combinations of BMI and metabolic health status before and after multiple imputations

| Participants             | Hazard ratio <sup>1</sup>          |                                      |                                    |                                      |                                    |                                      | Absolute risk <sup>4</sup> |                     |
|--------------------------|------------------------------------|--------------------------------------|------------------------------------|--------------------------------------|------------------------------------|--------------------------------------|----------------------------|---------------------|
|                          | Normal weight <sup>2</sup>         |                                      | Overweight <sup>2</sup>            |                                      | Obese <sup>2</sup>                 |                                      | MHNW                       | MUO                 |
|                          | Metabolically healthy <sup>3</sup> | Metabolically unhealthy <sup>3</sup> | Metabolically healthy <sup>3</sup> | Metabolically unhealthy <sup>3</sup> | Metabolically healthy <sup>3</sup> | Metabolically unhealthy <sup>3</sup> |                            |                     |
| Before MI<br>(n=516,393) |                                    |                                      |                                    |                                      |                                    |                                      |                            |                     |
| Women                    | Reference                          | 1.13 (1.07-1.20)                     | 1.14 (1.07-1.21)                   | 1.16 (1.09-1.22)                     | 1.34 (1.21-1.49)                   | 1.45 (1.36-1.54)                     | 11.1% (10.7%-11.5%)        | 15.2% (14.4%-16.0%) |
| Men                      | Reference                          | 1.16 (1.07-1.26)                     | 1.15 (1.08-1.23)                   | 1.35 (1.26-1.44)                     | 1.29 (1.12-1.49)                   | 1.69 (1.54-1.85)                     | 5.9% (5.6%-6.1%)           | 8.7% (8.0%-9.5%)    |
| After MI<br>(n=797,193)  |                                    |                                      |                                    |                                      |                                    |                                      |                            |                     |
| Women                    | Reference                          | 1.09 (1.03-1.14)                     | 1.14 (1.08-1.20)                   | 1.15 (1.10-1.21)                     | 1.34 (1.22-1.47)                   | 1.43 (1.35-1.51)                     | 10.7% (10.3%-11.0%)        | 14.4% (13.7%-15.1%) |
| Men                      | Reference                          | 1.17 (1.08-1.27)                     | 1.17 (1.10-1.25)                   | 1.38 (1.29-1.48)                     | 1.40 (1.21-1.63)                   | 1.91 (1.74-2.09)                     | 4.5% (4.2%-4.7%)           | 7.0% (6.4%-7.6%)    |

Abbreviations: MI, multiple imputations; MHNW, metabolically healthy normal weight; MUO, metabolically unhealthy obesity.

- Hazard ratios were calculated by use of Cox regression using age as time scale, adjusted for sex, baseline age, and smoking status and pack-years, and stratified by cohort and date of birth.
- Normal weight:  $18.5 \leq \text{BMI} < 25 \text{ kg/m}^2$ ; Overweight:  $25 \leq \text{BMI} < 30 \text{ kg/m}^2$ ; Obese:  $\text{BMI} \geq 30 \text{ kg/m}^2$
- Metabolically healthy: middle and lowest tertile of metabolic score; Metabolically unhealthy: top tertile of metabolic score. Metabolic score composes equal weight from mid-blood pressure, glucose, and triglycerides.
- Absolute risks at age 80 years were calculated using age as time metric and death as competing event.

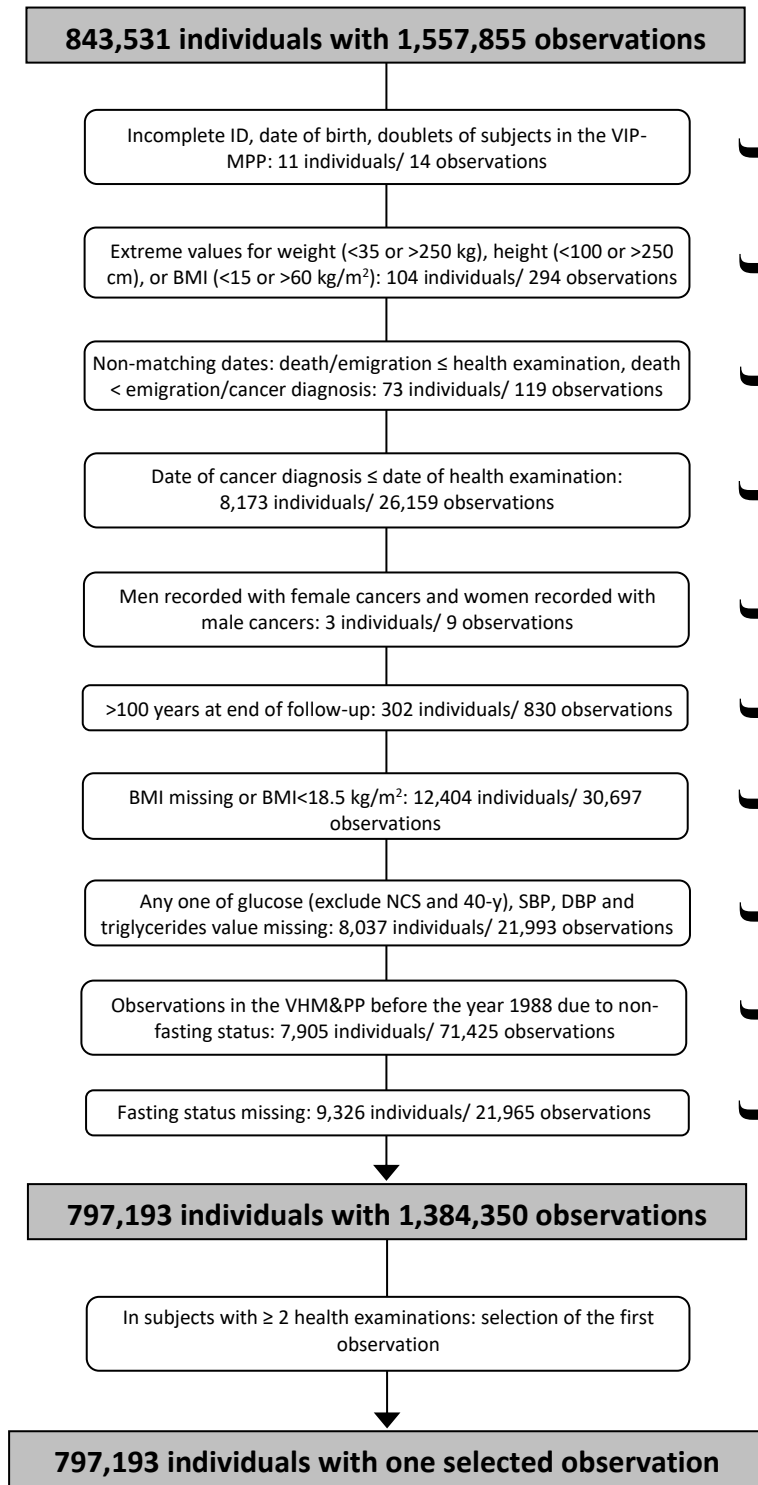

Supplementary figure 1. Flowchart of exclusions and selections of individuals and observations in the study.

↪ denotes exclusions.
